# Supplementary material
Source: PubMed Central journal article supplement (PMC8161510)
Supplement: NIHMS1699162-supplement-Supplementary_material.pdf [file NIHMS1699162-supplement-Supplementary_material.pdf]

## Supplementary information

---

# Direct cell reprogramming: approaches, mechanisms and progress

---

In the format provided by the authors and unedited

## Direct cell reprogramming: approaches and mechanisms

Haofei Wang, Yuchen Yang, Jiandong Liu and Li Qian

### Supplementary information

#### Supplementary Box 1 | Batch effect correction for scRNA-seq data

Systematic differences in gene expression profiles across batches, which is also known as ‘batch effect’, pose big challenges to integration analysis across multiple scRNA-seq datasets, especially those produced using different experimental protocols, and/or by different laboratories. Without proper correction, batch effects may result in misleading findings and/or failure in the identification of novel cell type(s) and differentially expressed genes<sup>1,2</sup> (left panel of the figure, two batches are shown in different colors, and the two different cell types are represented by solid circles and triangles, respectively. The data showed in the figure is pseudo data generated by computer simulation.). To correct the batch effect, many methods have been specifically developed for scRNA-seq data. One popular strategy, as employed by MNNcorrect<sup>3</sup> and Seurat v3<sup>4</sup>, is to correct the batch effect via adopting the information of mutual nearest neighbors (MNNs) between different batches. Here, MNNs refers to pairs of cells having mutually similar gene expression profiles across batches, which are assumed to be from the same biological state. This strategy is ideally suited for the datasets where the variation from the batch effect is less than or comparable to the true biological differences. LIGER is another widely used batch effect correction method that is designed for jointly inferring cell types across multiple scRNA-seq datasets<sup>5</sup>. Not only characterizing shared features among batches, but LIGER also takes batch-specific features into consideration, which can maximally recover the latent differentiation among different batches. These methods have been shown to achieve more accurate and robust batch effect corrections than traditional methods used in analyzing bulk RNA-seq data (right panel of the figure).

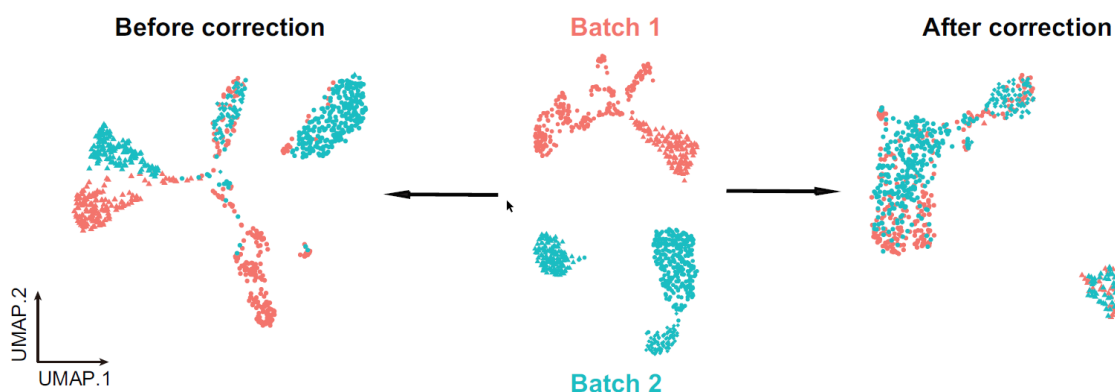

Supplementary table 1 | Examples of successful direct reprogramming

| Delivery method                         | Reprogramming cocktail                      | Efficiency | In vitro, in vivo | Advantage                                                             | Disadvantage                                                | Starting cell                              | Target cell type                            | Ref   |
|-----------------------------------------|---------------------------------------------|------------|-------------------|-----------------------------------------------------------------------|-------------------------------------------------------------|--------------------------------------------|---------------------------------------------|-------|
| Sendai virus                            | GMT                                         | 1.50%      | In vivo           | Non-integration and low cytotoxicity                                  |                                                             | Resident cardiac fibroblast                | Cardiomyocytes                              | 6     |
| Retrovirus                              | GHMT                                        | ~2.40%     | In vivo           | Easy to package, Large packaging capacity(~9kb)                       | Integrated into the genome, only infect proliferating cells | Resident cardiac fibroblast                | Cardiomyocytes                              | 7     |
|                                         | GMT                                         | 10-15%     | In vivo           |                                                                       |                                                             | Resident cardiac fibroblast                | Cardiomyocytes                              | 8     |
|                                         | Ascl1/Sox2/NeuroD1                          | -          | In vivo           |                                                                       |                                                             | Glial cells                                | Neurons                                     | 9     |
|                                         | Neurog2/FG2+EGF                             | -          | in vivo           |                                                                       |                                                             | non-neuron cells in neocortex and striatum | Neurons                                     | 10    |
|                                         | NeuroD1                                     | -          | In vivo           |                                                                       |                                                             | Reactive glial cells                       | Neurons                                     | 11    |
|                                         | FOXA3, HNF1A, HNF6                          |            | In vitro          |                                                                       |                                                             | Vein- and blood-derived endothelial        | Hepatic progenitor cells                    | 12    |
| Retrovirus/int raperitoneally injection | GMT/SB431542+ XAV939                        | -          | In vivo           | Easy to package                                                       | Integrated into the genome                                  | Resident cardiac fibroblast                | Cardiomyocytes                              | 13    |
| Lentivirus                              | miRNAs 1,133,208,499                        | 1.5-7.7%   | In vivo           | Easy to package, Large packaging capacity(~9kb)                       | Integrated into the genome                                  | Resident cardiac fibroblast                | Cardiomyocytes                              | 14    |
|                                         | Sox2                                        | -          | In vivo           |                                                                       |                                                             | Astrocytes                                 | Neuroblasts                                 | 15    |
| AAV                                     | FOXA3, GATA4, HNF1A and HNF4a               | 4%         | In vivo           | Specific targeting, could target both dividing and non-dividing cells | small packaging capacity (~4.7kb)                           | Hepatic myofibroblast                      | Hepatocytes                                 | 16    |
|                                         | Ascl1,Lmx1a, Nurr1                          | 66.81%     | In vivo           |                                                                       |                                                             | Resident glial cells                       | Neurons                                     | 17    |
|                                         | Ngn3, Pdx1, Mafa                            | 20%        | In vivo           |                                                                       |                                                             | Pancreatic exocrine                        | $\alpha$ cell, $\beta$ cell, $\delta$ cells | 18,19 |
|                                         | Mafa and Pdx1                               | 70%        | In vivo           |                                                                       |                                                             | $\alpha$ cell                              | $\beta$ cell                                | 20    |
|                                         | shPTB                                       | 80%        | In vivo           |                                                                       |                                                             | Astrocytes                                 | Neurons                                     | 21    |
| Nanoparticle                            | GMT                                         | -          | In vivo           | Low cytotoxicity, Non-integrating                                     |                                                             | Resident cardiac fibroblast                | Cardiomyocytes                              | 22    |
| Hydrodynamic tail vein injection        | Pdx1, Neurog3 and Mafa                      | -          | In vivo           | Non-integration                                                       | Could only target liver                                     | Liver cells                                | Insulin producing cell                      | 23    |
| Small molecules                         | CHIR99021, RepSox, Forskolin, VPA and TTNPB | -          | in vitro          | Non-integration, easy to                                              | Easy to diffuse, short half-life in vivo                    | Tail-tip fibroblast                        | Cardiomyocytes                              | 24    |

|         |                                                                                       |        |          |                                              |                                           |                       |                          |    |
|---------|---------------------------------------------------------------------------------------|--------|----------|----------------------------------------------|-------------------------------------------|-----------------------|--------------------------|----|
|         | VPA, CHIR99032, RepSox, Forskolin, i-Bet151 and ISX-9                                 | 8%     | in vitro | produce and administrate                     |                                           | Astrocytes            | Neurons                  | 25 |
|         | Forskolin, dorsomorphin                                                               | 99%    | in vitro |                                              |                                           | Fatal lung fibroblast | Cholinergic Neurons      | 26 |
|         | CHIR99021, A83-01, BIX01294, AS8351, SC1, Y27632, and OAC2                            | 6.60%  | in vivo  |                                              |                                           | Fibroblast            | Cardiomyocytes           | 27 |
|         | LDN193189, SB431542, TTNPB, thiazovivin, CHIR99021, VPA, DAPT, SAG, and purmorphamine | 54%    | in vitro |                                              |                                           | Astrocytes            | Neurons                  | 28 |
| mRNA    | GMT                                                                                   | 0.50%  | in vitro | Non-integration, No immune response          | Multiple transfection required            | Cardiac fibroblast    | Cardiomyocytes           | 29 |
| sgRNA   | Myod1                                                                                 | -      | in vitro | Activate endogenous gene expression directly | Required co-expression of CRISPRa protein | Fibroblast            | Myoblasts                | 30 |
|         | Ngn1, Brn2, Ezh2 and Foxo1                                                            | 83%    | in vitro |                                              |                                           | Fibroblast            | Neurons                  | 31 |
| Protein | Gata4, Hand2, MEf2c and Tbx5                                                          | 80.92% | in vitro | Non-integration                              | Low efficiency                            | Fibroblast            | Cardiac progenitor cells | 32 |

Supplementary table 2 | **Non-coding RNAs in direct reprogramming**

| miRNA             | Cocktail                                             | Target                        | Conversion cell type                       | Target cell type | In vitro, in vivo | Efficiency                                          | Ref   |
|-------------------|------------------------------------------------------|-------------------------------|--------------------------------------------|------------------|-------------------|-----------------------------------------------------|-------|
| miR-124           | miR-124, MYT1L, BRN2                                 | /                             | Human postnatal fibroblasts                | iNs              | In vitro          | 4-8%                                                | 33    |
|                   |                                                      |                               | Human primary dermal fibroblasts           |                  |                   | 1.5%-2.9% (abdominal skin) 9.5%-11.2% (breast skin) |       |
| miR-9/9*, miR-124 | miR-9/9*, miR-124, NEUROD2, ASCL1, MYT1L             | USP14, EZH2, and REST, BAF53b | human neonatal foreskin fibroblasts        | iNs              | In vitro          | ~10%                                                | 34,35 |
| miR-124           | miR124 and RA                                        | PTBP1                         | P19 cells                                  | iNs              | In vitro          | MAP2+ 72.7%                                         | 36    |
| miR-9/9*, miR-124 | miR-9/9*, miR-124, BCL11B, DLX1, DLX2, MYT1L, BCL-XL | /                             | Human postnatal fibroblasts                | iNs              | In vitro          | MAP2+ 90%                                           | 37    |
|                   |                                                      |                               | Human adult dermal fibroblasts             |                  |                   | MAP2+ 82%                                           |       |
| miR-302/367       | miR-302/367, VPA                                     | /                             | mice astrocytes                            | Neuroblasts      | In vivo           | /                                                   | 38    |
|                   | miR-302/367                                          |                               | Human astrocytes with miR injected to mice |                  | In vivo           | /                                                   |       |

|                                        |                                                                              |                                                                                                            |                                              |                 |          |                                                             |    |
|----------------------------------------|------------------------------------------------------------------------------|------------------------------------------------------------------------------------------------------------|----------------------------------------------|-----------------|----------|-------------------------------------------------------------|----|
|                                        | miR-302/367                                                                  |                                                                                                            | Human astrocytes                             |                 | In vitro | 80%(TUJ1)                                                   |    |
| miR-302/367 cluster, miR-9/9*, miR-124 | miR-302/367 cluster, miR-9/9*, miR-124                                       | /                                                                                                          | Human fibroblasts                            | iNs             | In vitro | /                                                           | 39 |
| miR-9/9*, miR-124                      | miR-9/9*, miR-124, Ascl1                                                     | Ctdsp1 and Ptpb1                                                                                           | murine Müller glia                           | iNs             | In vitro | MAP2+ 63%                                                   | 40 |
| miR-1, miR-133                         | /                                                                            | miR-133 represses SRF protein, so repress proliferation; miR-1 represses HDAC4, so promote differentiation | C2C12 myoblast cells                         | skeletal muscle | In vitro | /                                                           | 41 |
| miR-133                                | miR-133, Gata4, Mef2c, Tbx5                                                  | Snai1                                                                                                      | Mouse MEFs                                   | iCM             | In vitro | 0.35                                                        | 42 |
|                                        | miR-133, Gata4, Mef2c, Tbx5                                                  |                                                                                                            | Mouse adult cardiac fibroblasts              |                 |          | 0.12                                                        |    |
|                                        | miR133, Gata4, Mef2c, Tbx5, Mesp1, Myocd,                                    |                                                                                                            | Human cardiac fibroblasts                    |                 |          | 23%-27%                                                     |    |
| miR-1 miR-133, miR-208, miR-499        | Combination of miR-1 miR-133, miR-208, miR-499, with/without JAK inhibitor I | affects H3K27 methylation                                                                                  | Mouse neonatal cardiac fibroblasts           | iCM             | In vitro | 1.5%-7.7% without JAK inhibitor I ~28% with JAK inhibitor I | 14 |
|                                        |                                                                              |                                                                                                            | Mouse adult heart with myocardial infarction |                 |          | In vivo                                                     | 1% |
| miR-1, miR-133                         | Gata4, Hand2, Tbx5, myocardin, miR-1, miR-133                                | may play a role in development of sarcomere structure and suppression of smooth muscle gene expression     | Neonatal human foreskin fibroblasts          | iCM             | In vitro | ~20%                                                        | 44 |
|                                        |                                                                              |                                                                                                            | Human adult cardiac fibroblasts              |                 |          | ~13%                                                        |    |
|                                        |                                                                              |                                                                                                            | Human adult dermal fibroblasts               |                 |          | ~9.5%                                                       |    |

### References:

1. Kiselev, V. Y., Andrews, T. S. & Hemberg, M. Challenges in unsupervised clustering of single-cell RNA-seq data. *Nature Reviews Genetics* **20**, 273–282 (2019).
2. Stegle, O., Teichmann, S. A. & Marioni, J. C. Computational and analytical challenges in single-cell transcriptomics. *Nature Reviews Genetics* **16**, 133–145 (2015).
3. Haghverdi, L., Lun, A. T. L., Morgan, M. D. & Marioni, J. C. Batch effects in single-cell RNA-sequencing data are corrected by matching mutual nearest neighbors. *Nat. Biotechnol.* **36**, 421–427 (2018).

4. Stuart, T. *et al.* Comprehensive Integration of Single-Cell Data. *Cell* **177**, 1888-1902.e21 (2019).
5. Welch, J. D. *et al.* Single-Cell Multi-omic Integration Compares and Contrasts Features of Brain Cell Identity. *Cell* **177**, 1873-1887.e17 (2019).
6. Miyamoto, K. *et al.* Direct In Vivo Reprogramming with Sendai Virus Vectors Improves Cardiac Function after Myocardial Infarction. *Cell Stem Cell* **22**, 91-103.e5 (2018).
7. Song, K. *et al.* Heart repair by reprogramming non-myocytes with cardiac transcription factors. *Nature* **485**, 599–604 (2012).
8. Qian, L. *et al.* In vivo reprogramming of murine cardiac fibroblasts into induced cardiomyocytes. *Nature* **485**, 593–598 (2012).
9. Yamashita, T. *et al.* In vivo direct reprogramming of glial lineage to mature neurons after cerebral ischemia. *Sci. Rep.* **9**, 1–7 (2019).
10. Grande, A. *et al.* Environmental impact on direct neuronal reprogramming in vivo in the adult brain. *Nat. Commun.* **4**, (2013).
11. Guo, Z. *et al.* In Vivo Direct Reprogramming of Reactive Glial Cells into Functional Neurons after Brain Injury and in an Alzheimer’s Disease Model. *Cell Stem Cell* **14**, 188–202 (2014).
12. Inada, H. *et al.* Direct reprogramming of human umbilical vein- and peripheral blood-derived endothelial cells into hepatic progenitor cells. *Nat. Commun.* **11**, (2020).
13. Mohamed, T. M. A. *et al.* Chemical Enhancement of In Vitro and In Vivo Direct Cardiac Reprogramming. *Circulation* **135**, 978–995 (2017).
14. Jayawardena, T. M. *et al.* MicroRNA-mediated in vitro and in vivo direct reprogramming of cardiac fibroblasts to cardiomyocytes. *Circ. Res.* **110**, 1465–1473 (2012).
15. Niu, W. *et al.* In vivo reprogramming of astrocytes to neuroblasts in the adult brain. *Nat. Cell Biol.* **15**, 1164–1175 (2013).
16. Song, G. *et al.* Direct Reprogramming of Hepatic Myofibroblasts into Hepatocytes in Vivo Attenuates Liver Fibrosis. *Cell Stem Cell* **18**, 797–808 (2016).
17. Pereira, M. *et al.* Direct Reprogramming of Resident NG2 Glia into Neurons with Properties of Fast-Spiking Parvalbumin-Containing Interneurons. *Stem Cell Reports* **9**, 742–751 (2017).
18. Zhou, Q., Brown, J., Kanarek, A., Rajagopal, J. & Melton, D. A. In vivo reprogramming of adult pancreatic exocrine cells to  $\beta$ -cells. *Nature* **455**, 627–632 (2008).
19. Li, W. *et al.* In vivo reprogramming of pancreatic acinar cells to three islet endocrine subtypes. *Elife* **2014**, (2014).
20. Xiao, X. *et al.* Endogenous Reprogramming of Alpha Cells into Beta Cells, Induced by Viral Gene Therapy, Reverses Autoimmune Diabetes. *Cell Stem Cell* **22**, 78-90.e4 (2018).
21. Qian, H. *et al.* Reversing a model of Parkinson’s disease with in situ converted nigral neurons. *Nat.* **2020 5827813 582**, 550–556 (2020).
22. Chang, Y. *et al.* Efficient in vivo direct conversion of fibroblasts into cardiomyocytes using a nanoparticle-based gene carrier. *Biomaterials* **192**, 500–509 (2019).
23. Yang, X.-F., Ren, L.-W., Yang, L., Deng, C.-Y. & Li, F.-R. In vivo direct reprogramming of liver cells to insulin producing cells by virus-free overexpression of defined factors. *Endocr. J.* **64**, 291–302 (2017).
24. Fu, Y. *et al.* Direct reprogramming of mouse fibroblasts into cardiomyocytes with chemical cocktails. *Cell Res.* **25**, 1013–24 (2015).
25. Gao, L. *et al.* Direct Generation of Human Neuronal Cells from Adult Astrocytes by Small Molecules. *Stem Cell Reports* **8**, 538–547 (2017).
26. Liu, M. L. *et al.* Small molecules enable neurogenin 2 to efficiently convert human fibroblasts into cholinergic neurons. *Nat. Commun.* **4**, 1–10 (2013).
27. Cao, N. *et al.* Conversion of human fibroblasts into functional cardiomyocytes by small molecules. *Science (80-. ).* **352**, 1216–1220 (2016).
28. Zhang, L. *et al.* Small Molecules Efficiently Reprogram Human Astroglial Cells into Functional Neurons. *Cell Stem Cell* **17**, 735–747 (2015).

29. Lee, K. *et al.* Peptide-enhanced mRNA transfection in cultured mouse cardiac fibroblasts and direct reprogramming towards cardiomyocyte-like cells. *Int. J. Nanomedicine* **10**, 1841–1854 (2015).
30. Chakraborty, S. *et al.* A CRISPR/Cas9-based system for reprogramming cell lineage specification. *Stem Cell Reports* **3**, 940–947 (2014).
31. Liu, Y. *et al.* CRISPR Activation Screens Systematically Identify Factors that Drive Neuronal Fate and Reprogramming. *Stem Cell* **23**, 758-771.e8 (2018).
32. Li, X.-H. *et al.* Generation of Functional Human Cardiac Progenitor Cells by High-Efficiency Protein Transduction. *Stem Cells Transl. Med.* **4**, 1415–1424 (2015).
33. Ambasudhan, R. *et al.* Direct Reprogramming of Adult Human Fibroblasts to Functional Neurons under Defined Conditions. *Cell Stem Cell* **9**, 113–118 (2011).
34. Yoo, A. S. *et al.* MicroRNA-mediated conversion of human fibroblasts to neurons. *Nature* **476**, 228–231 (NIH Public Access, 2011).
35. Lee, S. W., Oh, Y. M., Lu, Y. L., Kim, W. K. & Yoo, A. S. MicroRNAs Overcome Cell Fate Barrier by Reducing EZH2-Controlled REST Stability during Neuronal Conversion of Human Adult Fibroblasts. *Dev. Cell* **46**, 73-84.e7 (2018).
36. Makeyev, E. V., Zhang, J., Carrasco, M. A. & Maniatis, T. The MicroRNA miR-124 Promotes Neuronal Differentiation by Triggering Brain-Specific Alternative Pre-mRNA Splicing. *Mol. Cell* **27**, 435–448 (2007).
37. Victor, M. B. *et al.* Generation of Human Striatal Neurons by MicroRNA-Dependent Direct Conversion of Fibroblasts. *Neuron* **84**, 311–323 (2014).
38. Ghasemi-Kasman, M., Hajikaram, M., Baharvand, H. & Javan, M. MicroRNA-mediated in vitro and in vivo direct conversion of astrocytes to neuroblasts. *PLoS One* **10**, (2015).
39. Zhou, C., Gu, H., Fan, R., Wang, B. & Lou, J. MicroRNA 302/367 Cluster Effectively Facilitates Direct Reprogramming from Human Fibroblasts into Functional Neurons. *Stem Cells Dev.* **24**, 2746–2755 (2015).
40. Wohl, S. G. & Reh, T. A. miR-124-9-9\* potentiates Ascl1-induced reprogramming of cultured Müller glia. *Glia* **64**, 743–762 (2016).
41. Chen, J. F. *et al.* The role of microRNA-1 and microRNA-133 in skeletal muscle proliferation and differentiation. *Nat. Genet.* **38**, 228–233 (2006).
42. Muraoka, N. *et al.* MiR-133 promotes cardiac reprogramming by directly repressing Snai1 and silencing fibroblast signatures. *EMBO J.* **33**, 1565–1581 (2014).
43. Dal-Pra, S., Hodgkinson, C. P., Mirotsoy, M., Kirste, I. & Dzau, V. J. Demethylation of H3K27 Is Essential for the Induction of Direct Cardiac Reprogramming by MIR Combo. *Circulation Research* **120**, 1403–1413 (2017).
44. Nam, Y. J. *et al.* Reprogramming of human fibroblasts toward a cardiac fate. *Proc. Natl. Acad. Sci. U. S. A.* **110**, 5588–5593 (2013).
